# Supplementary material for: Two-year intercomparison of three methods for measuring black carbon concentration at a high-altitude research station in Europe
Source: Copernicus journal article supplement (doi:10.5194/egusphere-2024-47), 2024-01-25
Supplement: Supplementary file 1 [file egusphere-2024-47-supplement.pdf]

## Supplement

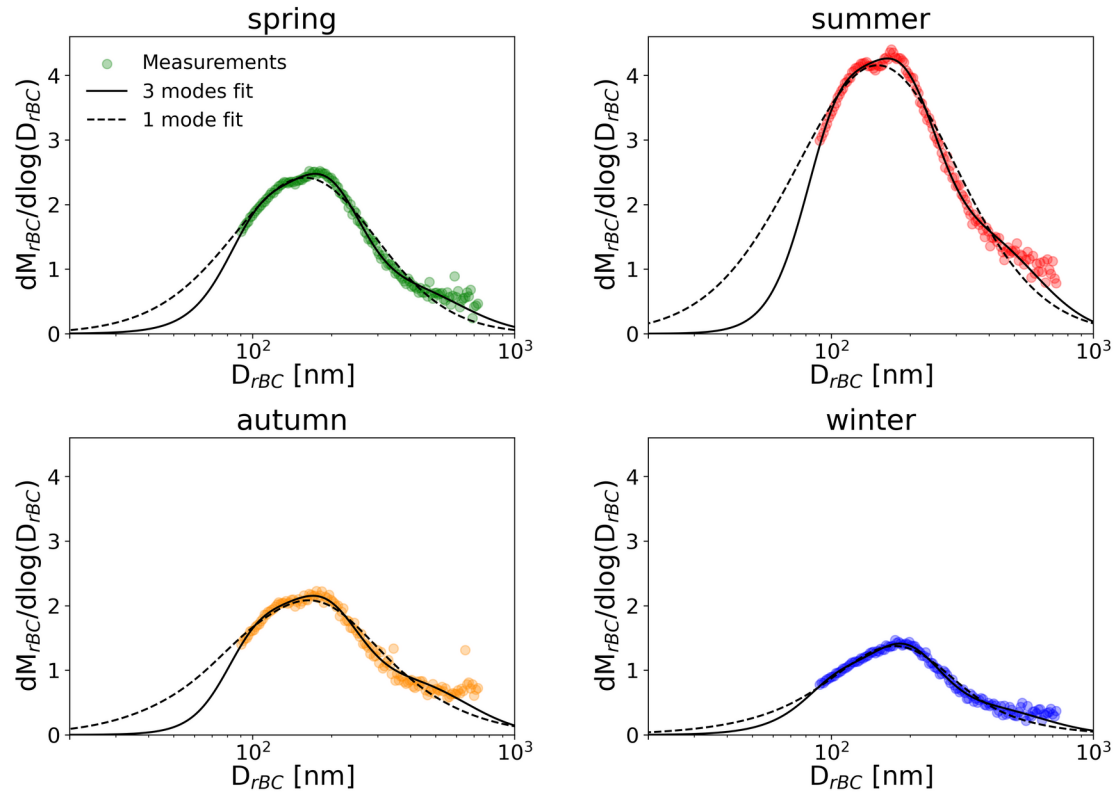

Figure S1: rBC size distribution observed and fitted with one (dashed black line) or three (solid black line) lognormal modes for 2019 and 2020 at the PDM grouped by seasons.

|                                                |                                                                                            | Winter (DJF)                   | Spring (MAM)       | Summer (JJA)       | Autumn (SON)       | All data           |                    |
|------------------------------------------------|--------------------------------------------------------------------------------------------|--------------------------------|--------------------|--------------------|--------------------|--------------------|--------------------|
| <b>Mass conc. all data [ng.m<sup>-3</sup>]</b> | <b>rBC</b> median (25th, 75th)                                                             | 5.59 (2.12,12.0)               | 17.9 (8.42, 43.3)  | 55.3 (24.6 85.5)   | 16.9 (4.61 156.1)  | 21.2 (6.54, 62.0)  |                    |
|                                                | <b>rBC</b> mean (stand. dev.)                                                              | 17.7 (42.0)                    | 31.6 (34.7)        | 61.4 (48.8)        | 33.5 (39.4)        | 39.4 (45.7)        |                    |
|                                                | <b>EC</b> median (25th, 75th)                                                              | 41.0 (36.0, 47.0)              | 48.0 (42.0, 66.0)  | 59.0 (54.0, 88.0)  | 46.0 (39.0, 62.0)  | 47.0 (38.0, 63.3)  |                    |
|                                                | <b>EC</b> mean (stand. dev.)                                                               | 40.1 (12.4)                    | 49.6 (25.0)        | 72.6 (34.0)        | 48.2 (13.7)        | 52.6 (26.0)        |                    |
|                                                | <b>eBC</b> median (25th, 75th)                                                             | 20.7 (12.1, 48.3)              | 73.4 (31.4, 151)   | 124 (37.9, 201)    | 18.1 (10.4, 46.2)  | 39.0 (16.0, 130)   |                    |
|                                                | <b>eBC</b> mean (stand. dev.)                                                              | 47.4 (63.4)                    | 98.4 (78.8)        | 127 (89.2)         | 42.6 (55.6)        | 78.5 (81.7)        |                    |
|                                                | <b>Mass conc. (only include data when pairs values are available) [ng.m<sup>-3</sup>]*</b> | <b>rBC</b> median (25th, 75th) | 11.4 (8.21,18.1)   | 32.3 (14.8, 46.3)  | 59.1 (37.7,66.6)   | 22.6 (8.21,55.2)   | 28.6 (14.1,55.5)   |
|                                                |                                                                                            | <b>rBC</b> mean (stand. dev.)  | <b>17.1</b> (16.7) | <b>34.4</b> (23.8) | <b>57.4</b> (24.9) | <b>35.2</b> (31.1) | <b>36.4</b> (28.4) |
| <b>EC</b> median (25th, 75th)                  |                                                                                            | 41.0 (37.0 , 47.0)             | 50.0 (42.0, 66.0)  | 59.0 (54.0 ,89.5)  | 45.5 (38.8, 62.3)  | 47.0 (39.0, 65.0)  |                    |
| <b>EC</b> mean (stand. dev.)                   |                                                                                            | <b>42.2</b> (9.18)             | <b>54.5</b> (22.6) | <b>73.5</b> (35.3) | <b>47.7</b> (14.0) | <b>54.7</b> (25.3) |                    |
| <b>eBC</b> median (25th, 75th)                 |                                                                                            | 29.4 (21.8, 35.8)              | 66.1 (46.2, 84.3)  | 129 (104, 167)     | 57.5 (29.3, 105)   | 65.5 (32.8, 118)   |                    |
| <b>eBC</b> mean (stand. dev.)                  |                                                                                            | <b>30.7</b> (12.2)             | <b>69.7</b> (31.8) | <b>138</b> (48.3)  | <b>70.9</b> (47.4) | <b>78.5</b> (54.3) |                    |

**Table S1. rBC, EC and eBC mean and median mass concentrations grouped by season and over the campaign. Standard deviations and 25<sup>th</sup> and 75<sup>th</sup> percentiles are given in parenthesis. \*Statistics are given for pairwise data (i. e. data when all variables were available) in order to compare the results of the different measurement methods.**

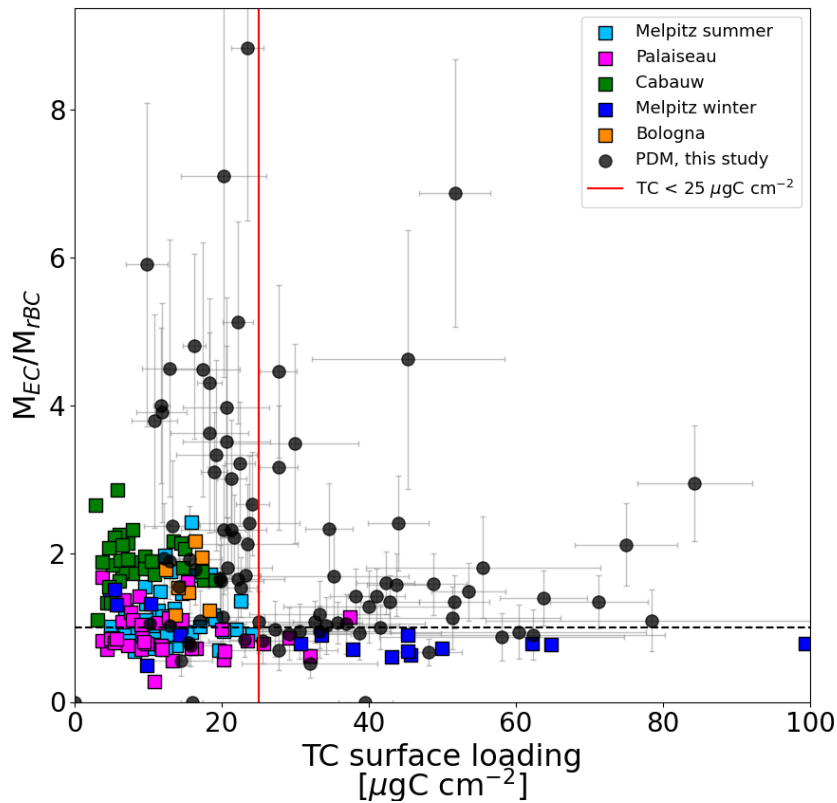

Figure S2:  $M_{EC}/M_{rBC}$  ratios as a function of the TC surface loading on the filter. The red line correspond to a TC surface loading of  $25 \mu\text{gC cm}^{-2}$ , which is the threshold below which  $M_{EC}$  values were invalidated. The colored points are from Pileci et al. (2021) and the black dots are the PDM data.

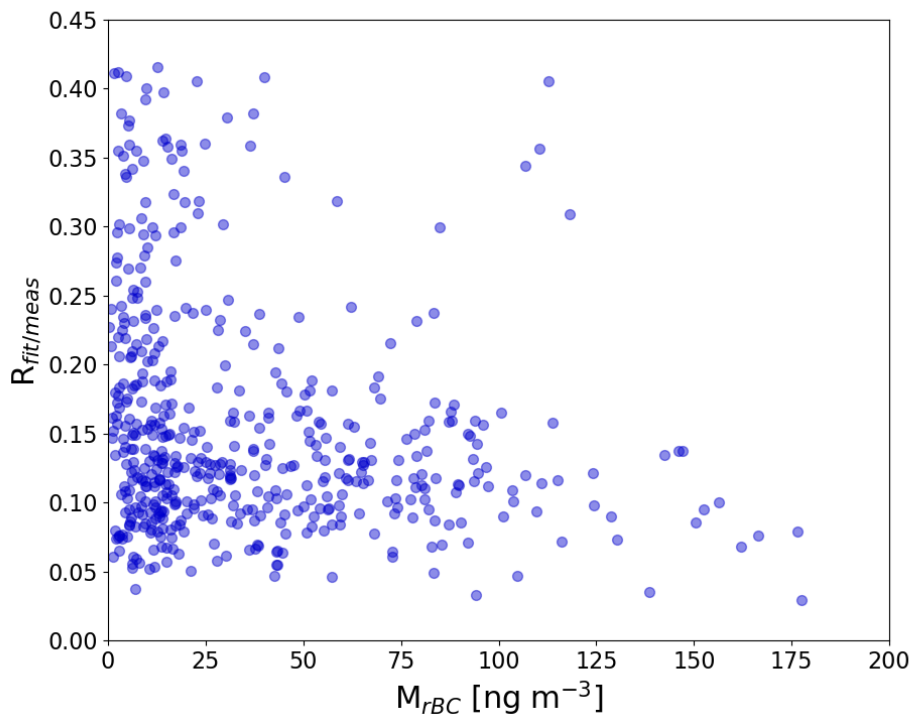

Figure S3:  $R_{fit/meas}$  as a function of  $M_{rBC}$ . Data are in a 1-day time resolution.
